# Supplementary material for: Lipidomic Profiling Reveals Disruption of Lipid Metabolism in Valproic Acid-Induced Hepatotoxicity
Source: PubMed Central journal article supplement (PMC6659130; doi:10.3389/fphar.2019.00819), 2019-07-19
Supplement: DataSheet_1.pdf [file DataSheet_1.pdf]

**Supplementary Table S1** Specific primers used for quantitative PCR analysis

| Name           | Forward primer (5'to 3') | Reverse primer (5'to 3') |
|----------------|--------------------------|--------------------------|
| <i>FATP1</i>   | ACAGGCACCTTCAAGATCCA     | TGTGGCCAGTAGAGGAACAG     |
| <i>FATP2</i>   | CTGCCCTTTTACCACAGTGC     | CGTAAGCCATTTCCCAGTGC     |
| <i>FATP3</i>   | TGGCAAATGAGGGCTTCGAC     | CTGTACCGGGCAGTTGTGAG     |
| <i>FATP4</i>   | CCTCATCAACACCAACCTGC     | TCTTTCAGCAGAGGGTCCAG     |
| <i>FATP5</i>   | CTTCCTCTACTTCCGCGACC     | CCCACCTTACCCTCACAACC     |
| <i>FABP1</i>   | AGTTTCTCCGGCAAGTACCA     | CCCCACCGTGAATTCGTTTT     |
| <i>CD36</i>    | CTTTGGCTTAATGAGACTGGGAC  | GCAACAAACATCACCACACCA    |
| <i>ACC1</i>    | ATGTCTGGCTTGCACCTAGTA    | CCCCAAAGCGAGTAACAAATTCT  |
| <i>FAS</i>     | CCCTCATCTCCCCACTCATC     | CAGCGTCTTCCACACTATGC     |
| <i>ACOT1</i>   | GTGAGCTCTGCCTTTCCATG     | GCTCTTCTGGTCAGGTCCTT     |
| <i>ACOT2</i>   | GTGAGCTCTGCCTTTCCATG     | GCTCTTCTGGTCAGGTCCTT     |
| <i>SCD1</i>    | TCTAGCTCCTATAACCACCACCA  | TCGTCTCCAATTATCTCCTCC    |
| <i>CPT1a</i>   | AACCCAGAGTACGTGTCCAG     | TTTCAGGTGCCTTCCAAAGC     |
| <i>ALDH3A2</i> | GAAGCAGCGATTTGACCACA     | TTTCCCCAGGTTATGCGTCT     |
| <i>EHHADH</i>  | TGGATGTGGGCTGGAAATCT     | TCTTCTGGCCAAATCGTCCT     |
| <i>AGPAT1</i>  | TCGTGCACTCTCTGGGATAC     | GGTTCGTTCCTTTCCCCAAC     |
| <i>DGAT2</i>   | ATTGCTGGCTCATCGCTGT      | GGGAAAGTAGTCTCGAAAGTAGC  |
| <i>ADPN</i>    | CCCATCTTTGTGCAGCTACC     | ATAGGGCCACGAAACAGTCA     |
| <i>GPAM</i>    | GCACCCGAAACTGATAGCTG     | CACTCACCCCATTCCTCACT     |
| <i>ABCB1</i>   | TGTTTTGTTCGGGACCACCA     | GCCCTCCACTCATTTGAGCT     |
| <i>ABCG1</i>   | GTTTGTGACAGACTGCGTGT     | CTTTGCCACTGATAGCGACC     |
| <i>ApoB100</i> | TGAAAGACAACGTGCCCAAG     | ATGGCCCCTTGATAAACCCA     |
| <i>ApoA1</i>   | TGTGTACGTGGATGTGCTCAAAG  | GTCACGCTGTCCCAGTTGTCA    |
| <i>PPARA</i>   | CTTCGCAAACCTTGGACCTGAA   | GCTACCAGCATCCCCTCTTT     |
| <i>PPARG</i>   | GACCACTCCCACTCCTTTGA     | GCAGGCTCCACTTTGATTGC     |
| <i>SREBP1c</i> | TCAGCGAGGCGGCTTTGGAGCAG  | CTGACCGACATCGAAGACATG    |
| <i>ChREBP</i>  | CGGGATGAGATTGAGGAGCT     | ATGAGGATGCTGAACACCCA     |
| <i>HNF4a</i>   | CAACCCAACCTCATCCTCCT     | CCACTCCAAGTTCCTGTTGC     |
| <i>CAR</i>     | TTCATCCATCACCAGCCCTT     | CAGATTTCCACAGCTGCTCC     |
| <i>AhR</i>     | TTGAACCATCCCCATACCCC     | TTCTGGCTGGCACTGATACA     |
| <i>PXR</i>     | AAGCCCAGTGTCAACGCAG      | GGGTCTTCCGGGTGATCTC      |
| <i>SGMS1</i>   | TGAGCCTCTGGAGCATTTC      | CCGTTCTTGTGTGCTTCCAA     |
| <i>SGMS2</i>   | TCAGCCCAAGGTCAGAAGAAT    | CTGGACTCAACCCGAACCTTC    |
| <i>KDSR</i>    | TACCCACCAGACACAGACAC     | CCGAGAGCATGTACCCATCT     |
| <i>SPTLC1</i>  | AGGCCCTCAACATCATGGAA     | CAGTCTGACATCTTGCTCGC     |
| <i>SPTLC2</i>  | GGGTTGTGAATGGGGAGGTA     | CACTGAGCATCCACGTGAAG     |
| <i>SGPL1</i>   | CGAGATGACAAATGGGGCAG     | GCGACCTATTGAAGTGCCTG     |
| <i>CERS2</i>   | TCTATATCACGCTGCCCTG      | CTTGCCACTGGTCAGGTAGA     |
| <i>CERS4</i>   | TCTCTGGTGCTGCTGTTACA     | AGATGAGGAAGAGAGCGTCG     |
| <i>SMPD1</i>   | CTCTTCCTCACTGACCTGCA     | CACCATATCAAAGGGCCGG      |

| Name                          | Forward primer (5'to 3') | Reverse primer (5'to 3') |
|-------------------------------|--------------------------|--------------------------|
| <i>LCAT</i>                   | TGTGGGTGTGCTCTATGAGG     | ATTGATGTGCTCCAGGGTCA     |
| <i>LPCAT1</i>                 | TGAAGTGTGTTGCAGAACCG     | ACAGAGACTCGAAACCAGGG     |
| <i>LPCAT2</i>                 | ACAAGTCCCTCTGATTGGCA     | TCCTCCTGATGTTGTTGCT      |
| <i>LPCAT3</i>                 | ACTCTCTCAGGGTCTCTCGT     | GCAGCCTGTCTTTCCACAAT     |
| <i>LPCAT4</i>                 | TCCCTCCATGACCCACTCTA     | TCAGTCTCCCTTCTGCTTGG     |
| <i>LYPLA1</i>                 | CGGTGTATGTGCGGCAATAA     | GCCCAGTATCTCCCAATCCA     |
| <i>TNF<math>\alpha</math></i> | AGGACCAGCTAAGAGGGAGA     | CCCGGATCATGCTTTCAGTG     |
| <i>IL6</i>                    | AGTCCTGATCCAGTTCCTGC     | CTACATTTGCCGAAGAGCCC     |
| <i>TGF<math>\beta</math></i>  | AGACTTTTCCCCAGACCTCG     | CAGAAGGTGGGTGGTCTTGA     |
| <i>GLUT1</i>                  | TGTGCTCCTGGTTCTGTTCT     | CAGCTCCTCGGGTGTCTTAT     |
| <i>GLUT2</i>                  | GAGTTGGCGCTGTAAACATGG    | GCACAAGTCCCCTGACATGAA    |
| <i>GLUT4</i>                  | CCGCTACCTCTACATCATCCA    | GCTTCCGCTTCTCATCCTTCA    |
| <i>GAPDH</i>                  | ACACCCACTCCTCCACCTTT     | CACCCTGTTGCTGTAGCCAA     |

**Supplementary Table S2** Comprehensive list of identified 176 lipids from patient serum

| <b>Lipid name</b> | <b>Formula</b> | <b>Retention time (min)</b> | <b>Extract Mass (Da)</b> | <b>Mass Type</b>           |
|-------------------|----------------|-----------------------------|--------------------------|----------------------------|
| PC 30:0           | C38H76O8NP     | 8.0                         | 764.5436                 | [M+CH3COOH-H] <sup>-</sup> |
| PC 32:0           | C40H80O8NP     | 8.9                         | 792.5749                 | [M+CH3COOH-H] <sup>-</sup> |
| PC 32:1           | C40H78O8NP     | 8.2                         | 790.5593                 | [M+CH3COOH-H] <sup>-</sup> |
| PC 32:2           | C40H76O8NP     | 7.6                         | 788.5436                 | [M+CH3COOH-H] <sup>-</sup> |
| PC 34:1           | C42H82O8NP     | 9.0                         | 818.5906                 | [M+CH3COOH-H] <sup>-</sup> |
| PC 34:2           | C42H80O8NP     | 8.5                         | 816.5749                 | [M+CH3COOH-H] <sup>-</sup> |
| PC 34:3           | C42H78O8NP     | 8.0                         | 814.5593                 | [M+CH3COOH-H] <sup>-</sup> |
| PC 34:4           | C42H76O8NP     | 7.5                         | 812.5436                 | [M+CH3COOH-H] <sup>-</sup> |
| PC 36:2           | C44H84O8NP     | 9.3                         | 844.6062                 | [M+CH3COOH-H] <sup>-</sup> |
| PC 36:3           | C44H82O8NP     | 8.7                         | 842.5906                 | [M+CH3COOH-H] <sup>-</sup> |
| PC 36:4           | C44H80O8NP     | 8.4                         | 840.5749                 | [M+CH3COOH-H] <sup>-</sup> |
| PC 36:5           | C44H78O8NP     | 7.9                         | 838.5593                 | [M+CH3COOH-H] <sup>-</sup> |
| PC 36:6           | C44H76O8NP     | 7.3                         | 836.5436                 | [M+CH3COOH-H] <sup>-</sup> |
| PC 38:2           | C46H88O8NP     | 10.0                        | 872.6375                 | [M+CH3COOH-H] <sup>-</sup> |
| PC 38:3           | C46H86O8NP     | 9.6                         | 870.6219                 | [M+CH3COOH-H] <sup>-</sup> |
| PC 38:4           | C46H84O8NP     | 9.2                         | 868.6062                 | [M+CH3COOH-H] <sup>-</sup> |
| PC 38:5           | C46H82O8NP     | 8.7                         | 866.5906                 | [M+CH3COOH-H] <sup>-</sup> |
| PC 40:4           | C48H88O8NP     | 9.8                         | 896.6375                 | [M+CH3COOH-H] <sup>-</sup> |
| PC 40:5           | C48H86O8NP     | 9.3                         | 894.6219                 | [M+CH3COOH-H] <sup>-</sup> |
| PC 40:6           | C48H84O8NP     | 9.1                         | 892.6062                 | [M+CH3COOH-H] <sup>-</sup> |
| LPC 14:0          | C22H46O7NP     | 2.0                         | 526.3140                 | [M+CH3COOH-H] <sup>-</sup> |
| LPC 16:0          | C24H50O7NP     | 2.8                         | 554.3453                 | [M+CH3COOH-H] <sup>-</sup> |
| LPC 16:1          | C24H48O7NP     | 2.3                         | 552.3296                 | [M+CH3COOH-H] <sup>-</sup> |
| LPC 18:0          | C26H54O7NP     | 3.8                         | 582.3766                 | [M+CH3COOH-H] <sup>-</sup> |
| LPC 18:1          | C26H52O7NP     | 3.0                         | 580.3609                 | [M+CH3COOH-H] <sup>-</sup> |
| LPC 18:2          | C26H50O7NP     | 2.5                         | 578.3453                 | [M+CH3COOH-H] <sup>-</sup> |
| LPC 20:0          | C28H58O7NP     | 4.8                         | 610.4079                 | [M+CH3COOH-H] <sup>-</sup> |
| LPC 20:3          | C28H52O7NP     | 3.8                         | 604.3609                 | [M+CH3COOH-H] <sup>-</sup> |
| LPC 20:4          | C28H50O7NP     | 2.5                         | 602.3453                 | [M+CH3COOH-H] <sup>-</sup> |
| PC O-32:1         | C40H80O7NP     | 9.4                         | 776.5800                 | [M+CH3COOH-H] <sup>-</sup> |
| PC O-34:1         | C42H84O7NP     | 9.6                         | 804.6113                 | [M+CH3COOH-H] <sup>-</sup> |
| PC O-34:2         | C42H82O7NP     | 9.0                         | 802.5957                 | [M+CH3COOH-H] <sup>-</sup> |
| PC O-36:3         | C44H84O7NP     | 9.2                         | 828.6113                 | [M+CH3COOH-H] <sup>-</sup> |
| PC O-36:4         | C44H82O7NP     | 8.9                         | 826.5957                 | [M+CH3COOH-H] <sup>-</sup> |
| PC O-36:5         | C44H80O7NP     | 8.8                         | 824.5800                 | [M+CH3COOH-H] <sup>-</sup> |
| PC O-36:6         | C44H78O7NP     | 8.9                         | 822.5644                 | [M+CH3COOH-H] <sup>-</sup> |
| PC O-38:4         | C46H86O7NP     | 9.8                         | 854.6270                 | [M+CH3COOH-H] <sup>-</sup> |
| PC O-38:5         | C46H84O7NP     | 9.0                         | 852.6113                 | [M+CH3COOH-H] <sup>-</sup> |

| <b>Lipid name</b> | <b>Formula</b> | <b>Retention time (min)</b> | <b>Extract Mass (Da)</b> | <b>Mass Type</b>           |
|-------------------|----------------|-----------------------------|--------------------------|----------------------------|
| PC O-38:6         | C46H82O7NP     | 8.9                         | 850.5957                 | [M+CH3COOH-H] <sup>-</sup> |
| PC O-40:5         | C48H88O7NP     | 9.8                         | 880.6426                 | [M+CH3COOH-H] <sup>-</sup> |
| PC O-40:6         | C48H86O7NP     | 9.3                         | 878.6270                 | [M+CH3COOH-H] <sup>-</sup> |
| PE 34:2           | C39H74O8NP     | 8.2                         | 714.5079                 | [M-H] <sup>-</sup>         |
| PE 36:2           | C41H78O8NP     | 8.0                         | 742.5392                 | [M-H] <sup>-</sup>         |
| PE 36:4           | C41H74O8NP     | 8.1                         | 738.5079                 | [M-H] <sup>-</sup>         |
| LPE 16:0          | C21H44O7NP     | 2.8                         | 452.2783                 | [M-H] <sup>-</sup>         |
| LPE 18:0          | C23H48O7NP     | 3.7                         | 480.3096                 | [M-H] <sup>-</sup>         |
| LPE 18:1          | C23H46O7NP     | 3.0                         | 478.2939                 | [M-H] <sup>-</sup>         |
| LPE 18:2          | C23H44O7NP     | 2.5                         | 476.2783                 | [M-H] <sup>-</sup>         |
| LPE 20:4          | C25H44O7NP     | 2.3                         | 500.2783                 | [M-H] <sup>-</sup>         |
| LPE 22:6          | C27H44O7NP     | 2.4                         | 524.2783                 | [M-H] <sup>-</sup>         |
| PE O-34:3         | C39H74O7NP     | 8.6                         | 698.5130                 | [M-H] <sup>-</sup>         |
| PE O-36:5         | C41H74O7NP     | 8.5                         | 722.5130                 | [M-H] <sup>-</sup>         |
| PE O-38:5         | C43H78O7NP     | 9.2                         | 750.5443                 | [M-H] <sup>-</sup>         |
| PE O-38:6         | C43H76O7NP     | 8.6                         | 748.5287                 | [M-H] <sup>-</sup>         |
| PE O-40:6         | C45H80O7NP     | 9.2                         | 776.5600                 | [M-H] <sup>-</sup>         |
| PI 34:1           | C43H81O13P     | 6.8                         | 835.5342                 | [M-H] <sup>-</sup>         |
| PI 34:2           | C43H79O13P     | 6.2                         | 833.5186                 | [M-H] <sup>-</sup>         |
| PI 38:4           | C47H83O13P     | 7.0                         | 885.5499                 | [M-H] <sup>-</sup>         |
| SM 32:1;2         | C37H75O6N2P    | 7.0                         | 675.5436                 | [M+H] <sup>+</sup>         |
| SM 32:2;2         | C37H73O6N2P    | 6.2                         | 673.5279                 | [M+H] <sup>+</sup>         |
| SM 34:0;3         | C39H81O7N2P    | 7.4                         | 721.5854                 | [M+H] <sup>+</sup>         |
| SM 34:1;2         | C39H79O6N2P    | 7.9                         | 703.5749                 | [M+H] <sup>+</sup>         |
| SM 34:1;3         | C39H79O7N2P    | 7.5                         | 719.5698                 | [M+H] <sup>+</sup>         |
| SM 34:2;2         | C39H77O6N2P    | 7.2                         | 701.5592                 | [M+H] <sup>+</sup>         |
| SM 34:2;3         | C39H77O7N2P    | 6.8                         | 717.5541                 | [M+H] <sup>+</sup>         |
| SM 36:1;2         | C41H83O6N2P    | 8.8                         | 731.6062                 | [M+H] <sup>+</sup>         |
| SM 36:2;2         | C41H81O6N2P    | 8.2                         | 729.5905                 | [M+H] <sup>+</sup>         |
| SM 38:1;2         | C43H87O6N2P    | 9.7                         | 759.6375                 | [M+H] <sup>+</sup>         |
| SM 38:2;2         | C43H85O6N2P    | 9.0                         | 757.6218                 | [M+H] <sup>+</sup>         |
| SM 40:1;2         | C45H91O6N2P    | 10.5                        | 787.6688                 | [M+H] <sup>+</sup>         |
| SM 40:2;2         | C45H89O6N2P    | 9.8                         | 785.6531                 | [M+H] <sup>+</sup>         |
| SM 42:1;2         | C45H95O6N2P    | 11.2                        | 815.7001                 | [M+H] <sup>+</sup>         |
| SM 42:2;2         | C45H93O6N2P    | 10.5                        | 813.6844                 | [M+H] <sup>+</sup>         |
| SM 42:2;3         | C45H93O7N2P    | 10.0                        | 829.6793                 | [M+H] <sup>+</sup>         |
| Cer 34:1;2        | C34H67N1O3     | 8.4                         | 538.5194                 | [M+H] <sup>+</sup>         |
| Cer 36:1;2        | C36H71N1O3     | 9.1                         | 566.5507                 | [M+H] <sup>+</sup>         |
| Cer 40:1;2        | C40H79N1O3     | 10.4                        | 622.6133                 | [M+H] <sup>+</sup>         |
| Cer 42:1;2        | C42H83N1O3     | 10.9                        | 650.6446                 | [M+H] <sup>+</sup>         |
| Cer 42:2;2        | C42H81N1O3     | 10.6                        | 648.6289                 | [M+H] <sup>+</sup>         |
| Cer 44:1;2        | C44H87N1O3     | 11.4                        | 678.6759                 | [M+H] <sup>+</sup>         |

| <b>Lipid name</b> | <b>Formula</b> | <b>Retention time (min)</b> | <b>Extract Mass (Da)</b> | <b>Mass Type</b>     |
|-------------------|----------------|-----------------------------|--------------------------|----------------------|
| CE 16:0           | C27H45C16H31O2 | 13.2                        | 642.6184                 | [M+NH4] <sup>+</sup> |
| CE 16:1           | C27H45C16H29O2 | 12.9                        | 640.6027                 | [M+NH4] <sup>+</sup> |
| CE 18:1           | C27H45C18H33O2 | 13.3                        | 668.6340                 | [M+NH4] <sup>+</sup> |
| CE 18:2           | C27H45C18H31O2 | 13.0                        | 666.6184                 | [M+NH4] <sup>+</sup> |
| CE 18:3           | C27H45C18H29O2 | 12.7                        | 664.6027                 | [M+NH4] <sup>+</sup> |
| CE 20:4           | C27H45C20H31O2 | 12.9                        | 690.6184                 | [M+NH4] <sup>+</sup> |
| CE 20:5           | C27H45C20H29O2 | 12.6                        | 688.6027                 | [M+NH4] <sup>+</sup> |
| CE 22:6           | C27H45C22H31O2 | 12.7                        | 714.6184                 | [M+NH4] <sup>+</sup> |
| DAG 26:0          | OHC29H55O4     | 7.5                         | 502.4466                 | [M+NH4] <sup>+</sup> |
| DAG 28:0          | OHC31H59O4     | 8.3                         | 530.4779                 | [M+NH4] <sup>+</sup> |
| DAG 28:1          | OHC31H57O4     | 7.7                         | 528.4623                 | [M+NH4] <sup>+</sup> |
| DAG 30:0          | OHC33H63O4     | 9.0                         | 558.5092                 | [M+NH4] <sup>+</sup> |
| DAG 30:1          | OHC33H61O4     | 8.6                         | 556.4936                 | [M+NH4] <sup>+</sup> |
| DAG 30:2          | OHC33H59O4     | 8.0                         | 554.4779                 | [M+NH4] <sup>+</sup> |
| DAG 32:0          | OHC35H67O4     | 9.8                         | 586.5405                 | [M+NH4] <sup>+</sup> |
| DAG 32:1          | OHC35H65O4     | 9.3                         | 584.5249                 | [M+NH4] <sup>+</sup> |
| DAG 32:2          | OHC35H63O4     | 8.8                         | 582.5092                 | [M+NH4] <sup>+</sup> |
| DAG 32:4          | OHC35H59O4     | 9.3                         | 578.4779                 | [M+NH4] <sup>+</sup> |
| DAG 34:0          | OHC37H71O4     | 10.4                        | 614.5718                 | [M+NH4] <sup>+</sup> |
| DAG 34:1          | OHC37H69O4     | 9.9                         | 612.5562                 | [M+NH4] <sup>+</sup> |
| DAG 34:2          | OHC37H67O4     | 9.4                         | 610.5405                 | [M+NH4] <sup>+</sup> |
| DAG 34:3          | OHC37H65O4     | 8.9                         | 608.5249                 | [M+NH4] <sup>+</sup> |
| DAG 36:2          | OHC39H71O4     | 10.0                        | 638.5718                 | [M+NH4] <sup>+</sup> |
| DAG 36:3          | OHC39H69O4     | 9.5                         | 636.5562                 | [M+NH4] <sup>+</sup> |
| DAG 36:4          | OHC39H67O4     | 9.1                         | 634.5405                 | [M+NH4] <sup>+</sup> |
| DAG 36:5          | OHC39H65O4     | 8.7                         | 632.5249                 | [M+NH4] <sup>+</sup> |
| DAG 38:5          | OHC41H69O4     | 9.5                         | 660.5562                 | [M+NH4] <sup>+</sup> |
| DAG 38:6          | OHC41H67O4     | 9.0                         | 658.5405                 | [M+NH4] <sup>+</sup> |
| TAG 40:1          | C43H80O6       | 11.4                        | 710.6293                 | [M+NH4] <sup>+</sup> |
| TAG 40:2          | C43H78O6       | 11.1                        | 708.6137                 | [M+NH4] <sup>+</sup> |
| TAG 42:1          | C45H84O6       | 11.8                        | 738.6606                 | [M+NH4] <sup>+</sup> |
| TAG 42:2          | C45H82O6       | 11.5                        | 736.6450                 | [M+NH4] <sup>+</sup> |
| TAG 44:0          | C47H90O6       | 12.5                        | 768.7076                 | [M+NH4] <sup>+</sup> |
| TAG 44:1          | C47H88O6       | 12.2                        | 766.6919                 | [M+NH4] <sup>+</sup> |
| TAG 44:2          | C47H86O6       | 11.9                        | 764.6763                 | [M+NH4] <sup>+</sup> |
| TAG 44:3          | C47H84O6       | 11.5                        | 762.6606                 | [M+NH4] <sup>+</sup> |
| TAG 44:4          | C47H82O6       | 11.3                        | 760.6450                 | [M+NH4] <sup>+</sup> |
| TAG 46:0          | C49H94O6       | 12.9                        | 796.7389                 | [M+NH4] <sup>+</sup> |
| TAG 46:1          | C49H92O6       | 12.6                        | 794.7232                 | [M+NH4] <sup>+</sup> |
| TAG 46:2          | C49H90O6       | 12.3                        | 792.7076                 | [M+NH4] <sup>+</sup> |
| TAG 46:3          | C49H88O6       | 12.1                        | 790.6919                 | [M+NH4] <sup>+</sup> |
| TAG 46:4          | C49H86O6       | 11.8                        | 788.6763                 | [M+NH4] <sup>+</sup> |

| <b>Lipid name</b> | <b>Formula</b> | <b>Retention time (min)</b> | <b>Extract Mass (Da)</b> | <b>Mass Type</b>     |
|-------------------|----------------|-----------------------------|--------------------------|----------------------|
| TAG 46:5          | C49H84O6       | 11.5                        | 786.6606                 | [M+NH4] <sup>+</sup> |
| TAG 48:0          | C51H98O6       | 13.2                        | 824.7702                 | [M+NH4] <sup>+</sup> |
| TAG 48:1          | C51H96O6       | 12.9                        | 822.7545                 | [M+NH4] <sup>+</sup> |
| TAG 48:2          | C51H94O6       | 12.7                        | 820.7389                 | [M+NH4] <sup>+</sup> |
| TAG 48:3          | C51H92O6       | 12.4                        | 818.7232                 | [M+NH4] <sup>+</sup> |
| TAG 48:4          | C51H90O6       | 12.1                        | 816.7076                 | [M+NH4] <sup>+</sup> |
| TAG 48:5          | C51H88O6       | 11.8                        | 814.6919                 | [M+NH4] <sup>+</sup> |
| TAG 50:1          | C53H100O6      | 13.2                        | 850.7858                 | [M+NH4] <sup>+</sup> |
| TAG 50:2          | C53H98O6       | 13.0                        | 848.7702                 | [M+NH4] <sup>+</sup> |
| TAG 50:3          | C53H96O6       | 12.7                        | 846.7545                 | [M+NH4] <sup>+</sup> |
| TAG 50:4          | C53H94O6       | 12.5                        | 844.7389                 | [M+NH4] <sup>+</sup> |
| TAG 50:5          | C53H92O6       | 12.3                        | 842.7232                 | [M+NH4] <sup>+</sup> |
| TAG 50:6          | C53H90O6       | 12.1                        | 840.7076                 | [M+NH4] <sup>+</sup> |
| TAG 52:2          | C55H102O6      | 13.3                        | 876.8015                 | [M+NH4] <sup>+</sup> |
| TAG 52:3          | C55H100O6      | 13.0                        | 874.7858                 | [M+NH4] <sup>+</sup> |
| TAG 52:4          | C55H98O6       | 12.8                        | 872.7702                 | [M+NH4] <sup>+</sup> |
| TAG 52:5          | C55H96O6       | 12.6                        | 870.7545                 | [M+NH4] <sup>+</sup> |
| TAG 52:6          | C55H94O6       | 12.4                        | 868.7389                 | [M+NH4] <sup>+</sup> |
| TAG 52:7          | C55H92O6       | 12.2                        | 866.7232                 | [M+NH4] <sup>+</sup> |
| TAG 52:8          | C55H90O6       | 11.9                        | 864.7076                 | [M+NH4] <sup>+</sup> |
| TAG 54:3          | C57H104O6      | 13.3                        | 902.8171                 | [M+NH4] <sup>+</sup> |
| TAG 54:4          | C57H102O6      | 13.1                        | 900.8015                 | [M+NH4] <sup>+</sup> |
| TAG 54:5          | C57H100O6      | 13.0                        | 898.7858                 | [M+NH4] <sup>+</sup> |
| TAG 54:6          | C57H98O6       | 12.8                        | 896.7702                 | [M+NH4] <sup>+</sup> |
| TAG 54:7          | C57H96O6       | 12.5                        | 894.7545                 | [M+NH4] <sup>+</sup> |
| TAG 54:8          | C57H94O6       | 12.3                        | 892.7389                 | [M+NH4] <sup>+</sup> |
| TAG 56:1          | C59H112O6      | 14.2                        | 934.8797                 | [M+NH4] <sup>+</sup> |
| TAG 56:2          | C59H110O6      | 13.9                        | 932.8641                 | [M+NH4] <sup>+</sup> |
| TAG 56:3          | C59H108O6      | 13.6                        | 930.8484                 | [M+NH4] <sup>+</sup> |
| TAG 56:4          | C59H106O6      | 13.4                        | 928.8328                 | [M+NH4] <sup>+</sup> |
| TAG 56:5          | C59H104O6      | 13.2                        | 926.8171                 | [M+NH4] <sup>+</sup> |
| TAG 56:6          | C59H102O6      | 13.0                        | 924.8015                 | [M+NH4] <sup>+</sup> |
| TAG 56:7          | C59H100O6      | 12.9                        | 922.7858                 | [M+NH4] <sup>+</sup> |
| TAG 56:8          | C59H98O6       | 12.7                        | 920.7702                 | [M+NH4] <sup>+</sup> |
| TAG 56:9          | C59H96O6       | 12.4                        | 918.7545                 | [M+NH4] <sup>+</sup> |
| TAG 58:4          | C61H110O6      | 13.7                        | 956.8641                 | [M+NH4] <sup>+</sup> |
| TAG 58:5          | C61H108O6      | 13.5                        | 954.8484                 | [M+NH4] <sup>+</sup> |
| TAG 58:6          | C61H106O6      | 13.3                        | 952.8328                 | [M+NH4] <sup>+</sup> |
| TAG 58:7          | C61H104O6      | 13.1                        | 950.8171                 | [M+NH4] <sup>+</sup> |
| TAG 58:8          | C61H102O6      | 13.0                        | 948.8015                 | [M+NH4] <sup>+</sup> |
| TAG 58:9          | C61H100O6      | 12.7                        | 946.7858                 | [M+NH4] <sup>+</sup> |
| TAG 60:8          | C63H106O6      | 13.2                        | 976.8328                 | [M+NH4] <sup>+</sup> |

| <b>Lipid name</b> | <b>Formula</b> | <b>Retention time (min)</b> | <b>Extract Mass (Da)</b> | <b>Mass Type</b>     |
|-------------------|----------------|-----------------------------|--------------------------|----------------------|
| TAG 60:9          | C63H104O6      | 13.0                        | 974.8171                 | [M+NH4] <sup>+</sup> |
| TAG 60:10         | C63H102O6      | 12.9                        | 972.8015                 | [M+NH4] <sup>+</sup> |
| TAG 60:11         | C63H100O6      | 12.7                        | 970.7858                 | [M+NH4] <sup>+</sup> |
| TAG 60:12         | C63H98O6       | 12.5                        | 968.7702                 | [M+NH4] <sup>+</sup> |
| MAG 20:2          | C23H42O4       | 2.8                         | 400.3421                 | [M+NH4] <sup>+</sup> |
| MAG 20:3          | C23H40O4       | 2.2                         | 398.3265                 | [M+NH4] <sup>+</sup> |
| MAG 20:4          | C23H38O4       | 1.7                         | 396.3108                 | [M+NH4] <sup>+</sup> |
| MAG 22:2          | C25H46O4       | 3.7                         | 428.3734                 | [M+NH4] <sup>+</sup> |
| MAG 22:4          | C25H42O4       | 2.4                         | 424.3421                 | [M+NH4] <sup>+</sup> |
| FFA 24:0          | HC24H47O2      | 8.3                         | 367.3582                 | [M-H] <sup>-</sup>   |
| FFA 24:1          | HC24H45O2      | 7.3                         | 365.3425                 | [M-H] <sup>-</sup>   |
| FFA 26:0          | HC26H51O2      | 9.3                         | 395.3895                 | [M-H] <sup>-</sup>   |

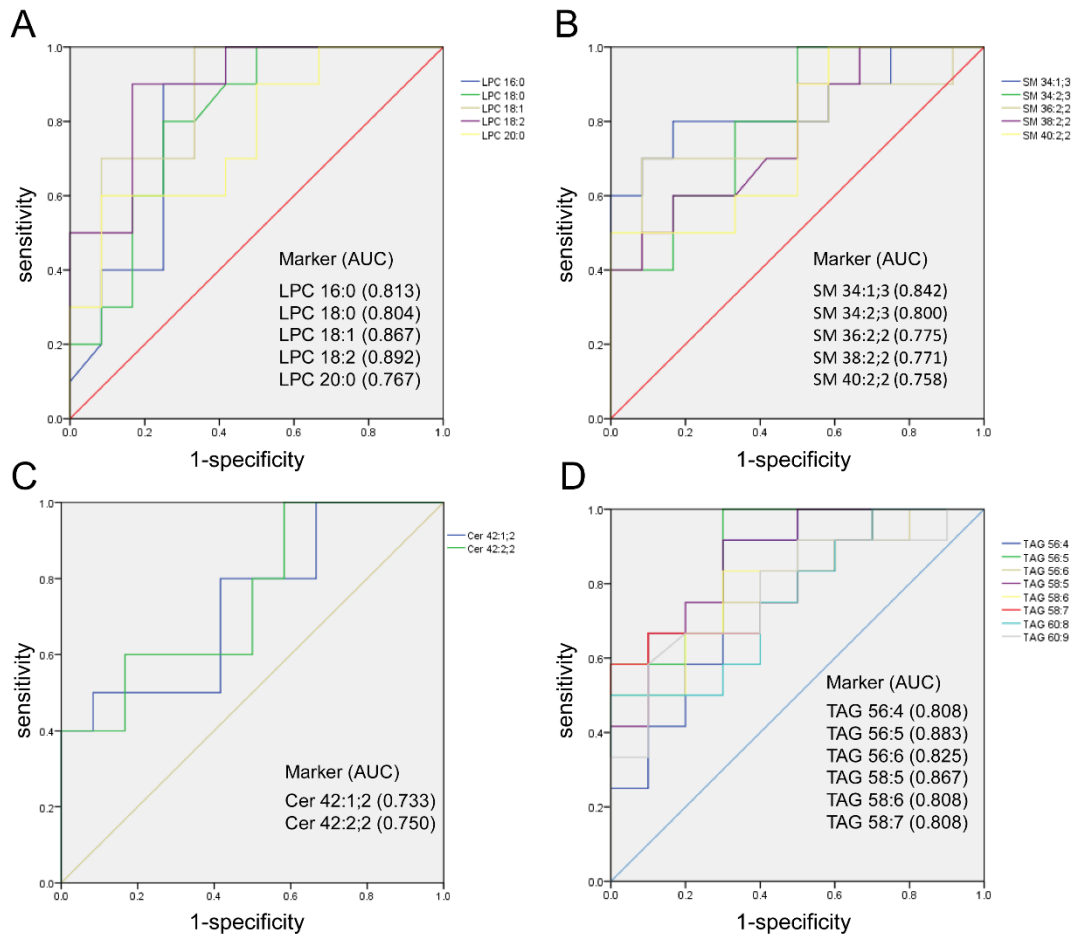

**Supplementary Figure S1** ROC curves of the candidate biomarker for VPA hepatotoxicity diagnosis in epileptic children.



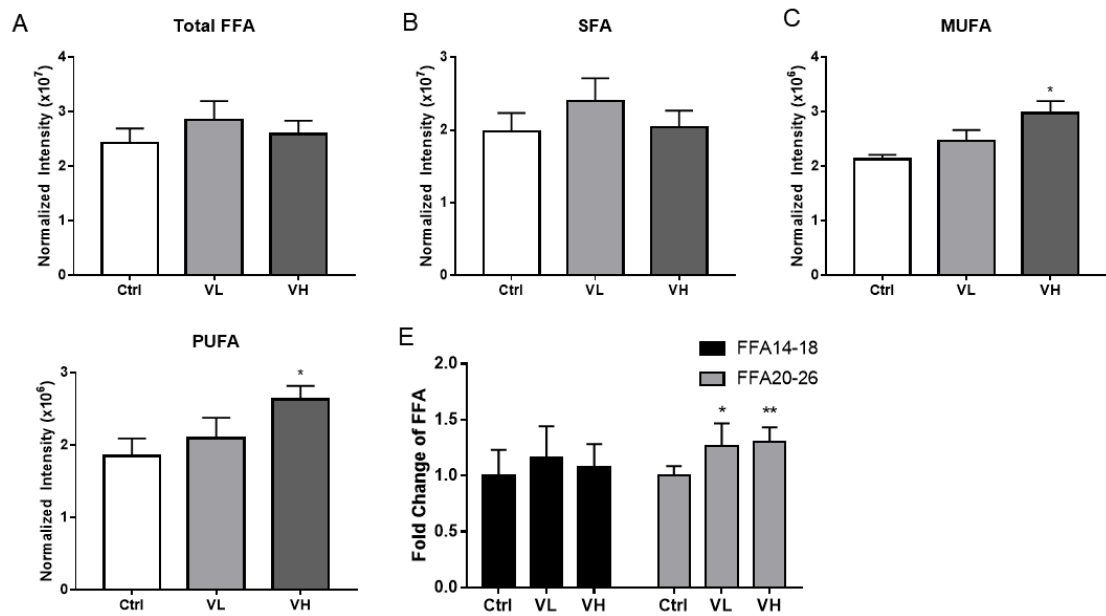

**Supplementary Figure S2** Effect of VPA on FFA levels in L02 cells. Total hepatic FFA levels (A) and saturated fatty acid (SFA) (B) showed no difference among the groups. The hepatic monounsaturated fatty acid (MUFA) (C), and polyunsaturated fatty acid (PUFA) levels (D) increased in VH (VPA 5 mM) group compared with control. Long-chain FFA (FFA20-26) increased in VL (VPA 1 mM) and VH (VPA 5mM) groups. Data were means  $\pm$  SD, \*  $P < 0.05$  versus control group.

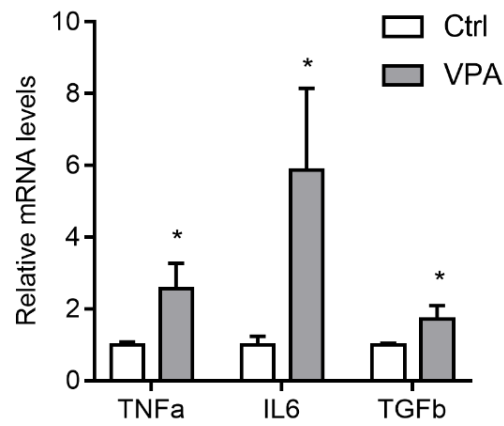

**Supplementary Figure S3** VPA induced proinflammatory cytokines in hepatocytes. Real-time PCR analysis of *TNFα*, *IL6* and *TGFβ* mRNA expressions after VPA (1 mM) treatment for 24 h. The mRNA levels were normalized to those of GAPDH mRNA and subsequently normalized to those of control groups. Values were presented as mean ± SD, \*  $P < 0.05$  compared with control group ( $n = 3$ ).

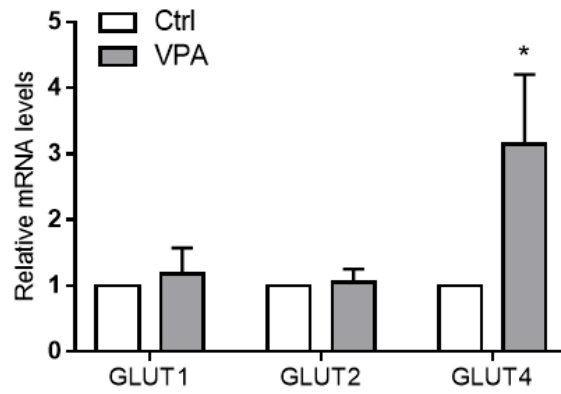

**Supplementary Figure S4** Effect of VPA on mRNA levels of GLUTs in L02 cells. Real-time PCR analysis of GLUT1, GLUT2 and GLUT4 mRNA expressions after VPA (1 mM) treatment for 24 h. The mRNA levels were normalized to those of GAPDH mRNA and subsequently normalized to those of control groups. Values were presented as mean  $\pm$  SD, \*  $P < 0.05$  compared with control group ( $n = 3$ ).
